# Supplementary material
Source: PubMed Central journal article supplement (PMC5830378)
Supplement: 2017_181941-Disclosures_and_Contributions.pdf [file 2017_181941-Disclosures_and_Contributions.pdf]

Haematologica  
HAEMATOL/2017/181941  
Version 2

Macrocytosis and dysplastic anemia is associated with the  
Cyclin-Dependent Kinase 4/6 inhibitor palbociclib in metastatic breast  
cancer

Jesus Anampa, Tamanna Haque, Irina Murakhovskaya, Yanhua Wang,  
Kimo Bachiashvili, Cristian Papazoglu, Kith Pradhan, Ulrich G. Steidl,  
Joseph A. Sparano, and Amit Verma

Disclosures: The authors have no conflict of interest.

Contributions: J.A, J.A.S and A.V designed the research and wrote manuscript. C.P and K.B performed stem cells experiments; J.A and K.P conducted statistical analysis and made figures; T.H performed data collection and interpreted retrospective study results. J.A, I.M and Y.W performed and analyzed peripheral blood & bone marrow morphology, obtained and interpreted morphology images, contributed to study results and discussion. U.S and A.V conducted stem cell experiments & interpreted results. All authors revised the final manuscript before submission.
